# Supplementary material for: The Associations between Child Irritability, Parental Distress, Parental Irritability and Family Functioning in Children Accessing Mental Health Services
Source: Springer Nature journal article supplement (doi:10.1007/s10826-022-02390-2), 2022-08-31
Supplement: MOESM1 [file 23439422]

**Supplementary tables and figures**

Table S1

*Medication List*

| **Medication type** | ***n (%)*** |
| --- | --- |
| Antipsychotics (i.e. Risperidone) | 7 (14) |
| Clonidine (i.e. Catapres) | 4 (7) |
| Stimulant (i.e. Methylphenidate or Lisdexamfetamine) | 5 (10) |
| Melatonin | 8 (16) |
| Serotonin reuptake inhibitors (SSRIs) (i.e. Fluoxetine or Sertraline) | 10 (20) |

*Notes*. Parents reported medications. Average 1.6 medications per child, with a maximum of 4.


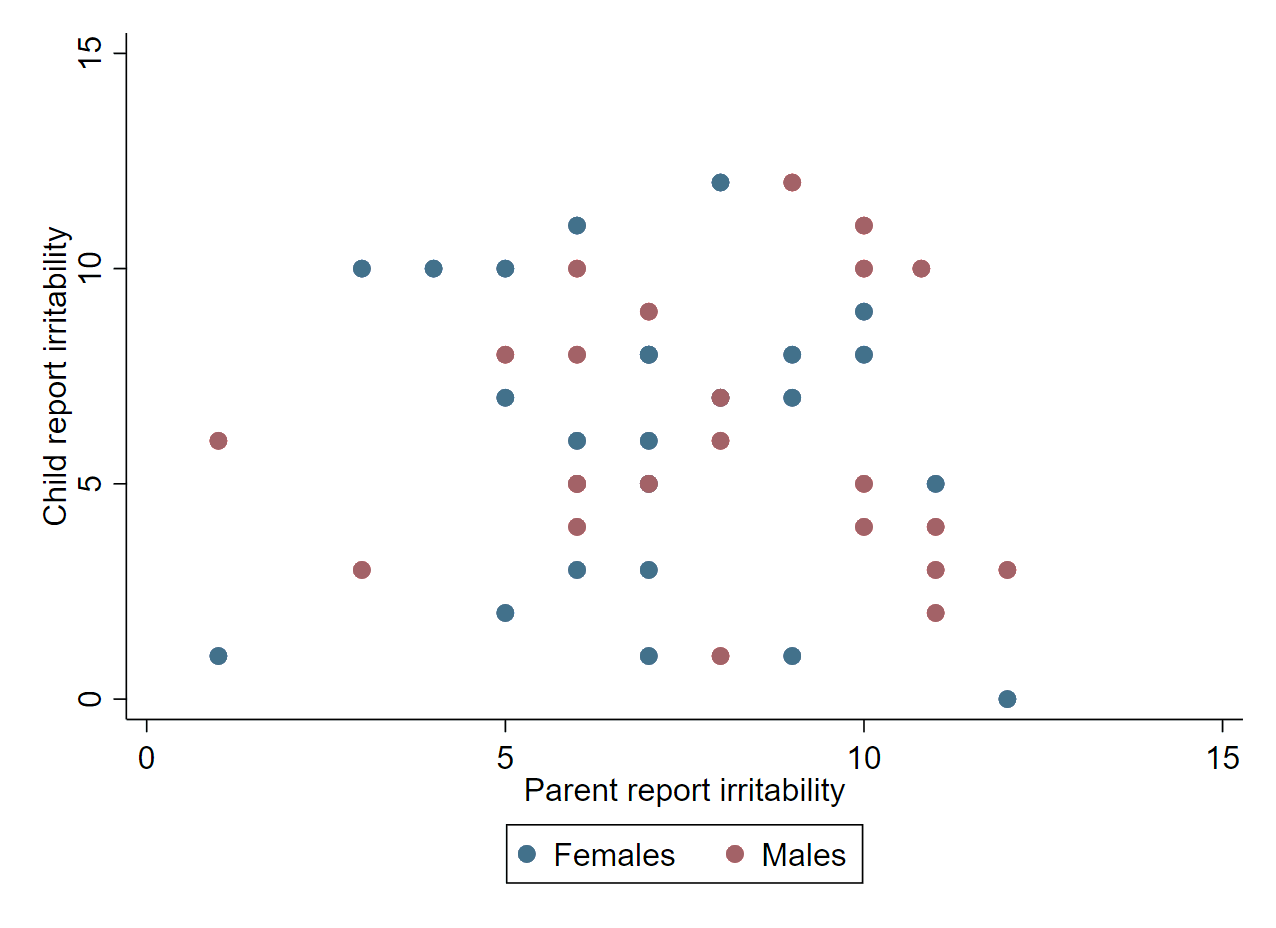


*Figure S1.*Scatterplot of youth irritability as self-rated by male and females and parents on the Affective Reactivity Index (ARI) scale. Scatter patterns indicated a low correlation between variables.
